# Supplementary material for: Local-scale Partitioning of Functional and Phylogenetic Beta Diversity in a Tropical Tree Assemblage
Source: PubMed Central journal article supplement (PMC4522671; doi:10.1038/srep12731), 2015-08-03
Supplement: srep12731-s1.pdf [file srep12731-s1.pdf]

# **Local-scale Partitioning of Functional and Phylogenetic Beta Diversity in a Tropical Tree Assemblage**

Jie Yang<sup>1</sup>, Nathan G. Swenson<sup>2</sup>, Guocheng Zhang<sup>1,3</sup>, Xiuqin Ci<sup>1,3</sup>, Min  
Cao<sup>1</sup>, Liqing Sha<sup>1</sup>, Jie Li<sup>1</sup>, J. W. Ferry Slik<sup>1</sup>, Luxiang Lin<sup>1\*</sup>

<sup>1</sup>Key Laboratory of Tropical Forest Ecology, Xishuangbanna Tropical Botanical  
Garden, Chinese Academy of Sciences, Kunming, China, <sup>2</sup>Department of Plant  
Biology, Michigan State University, East Lansing, Michigan, U.S.A., <sup>3</sup>University of  
Chinese Academy of Sciences, Beijing, China

\* Correspondence and requests for materials should be addressed to L.L.  
(linluxa@xtbg.ac.cn)

## Figure legends

**Figure S1 Geographical location and the spatial distribution of the three habitat types in 20-ha Xishuangbanna forest dynamics plot.** Colors represent different habitat types at the spatial scale of  $20 \times 20$  m. The map was generated using DIVA-GIS 7.5.

**Figure S2 The phylogenetic tree constructed from DNA barcodes of the 428 species in the 20-ha Xishuangbanna forest dynamics plot.**

**Figure S3 The distribution of standard effective size for non-abundance-weighted mean pairwise phylogenetic distance (*S.E.S. D<sub>pw</sub>*) and standard effective size for non-abundance-weighted mean nearest taxon phylogenetic distance (*S.E.S. D<sub>nn</sub>*) across scales.** Bars to the left of the red zero line indicates phylogenetic turnover is faster than expected. The proportions of S.E.S values below zero were as follows: (a) 65.16%, (b) 77.35%, (c) 51.28%, (d) 81.76%, (e) 47.80%, (f) 85.81%, (g) 69.75%, (h) 94.56%.

**Figure S4 The distribution of standard effective size for non-abundance-weighted mean pairwise functional distance (*S.E.S. D<sub>pw</sub>*) and standard effective size for non-abundance-weighted mean nearest taxon functional distance (*S.E.S. D<sub>nn</sub>*) across scales.** Bars to the left of the red zero line indicates functional turnover is faster than expected. The proportions of S.E.S values below zero were as follows: (a) 56.35%, (b) 71.26%, (c) 95.6%, (d)

95.48%, (e) 98.02%, (f) 95.91%, (g) 99.6%, (h) 90.25%.

**Table S1 The loadings of eight continuous functional traits on the first three principal components for 428 tree species in the 20-ha Xishuangbanna forest dynamics plot.**

| Functional traits        | PCA1   | PCA2   | PCA3   |
|--------------------------|--------|--------|--------|
| LDMC                     | -0.534 | -0.008 | -0.376 |
| Leaf area                | 0.302  | 0.499  | 0.278  |
| Leaf chlorophyll content | -0.165 | 0.362  | 0.005  |
| Leaf thickness           | 0.091  | 0.696  | -0.113 |
| Maximum height           | -0.273 | 0.112  | 0.553  |
| Seed mass                | -0.336 | 0.014  | 0.544  |
| SLA                      | 0.522  | -0.325 | 0.303  |
| Stem specific resistance | -0.358 | -0.130 | 0.274  |
| % explained              | 49.961 | 12.264 | 10.514 |

SLA, specific leaf area; LDMC, leaf dry mass content.

**Table S2 Classification criteria for the three topographical habitat types for all 20 × 20 m quadrats in the 20-ha Xishuangbanna forest dynamics plot.**

| Habitats           | Valley  | Slope   | Ridge   |
|--------------------|---------|---------|---------|
| Elevation (m)      | < 779.8 | all     | all     |
| Slope (degree)     | all     | ≥ 27.14 | < 27.14 |
| Convexity (degree) | < 0     | ≥ 0     | all     |

27.14 and 779.8 are median slope and median elevation respectively for all 20 × 20 m quadrats within the plot.

**Table S3 The variation of phylogenetic dissimilarity explained by geographic and environmental distances across scales using multiple regressions on distance matrices based on non-abundance-weighted metrics.**

| Scale<br>(m <sup>2</sup> ) | Response<br>distance<br>matrix | Explanatory distance matrices                              |                        |                           |
|----------------------------|--------------------------------|------------------------------------------------------------|------------------------|---------------------------|
|                            |                                | Combination of<br>geographic and<br>environmental distance | Geographic<br>distance | Environmental<br>distance |
| 10 × 10                    | <i>D<sub>pw</sub></i>          | 0.096***                                                   | 0.002***               | 0.096***                  |
|                            | <i>D<sub>nn</sub></i>          | 0.089*                                                     | 0.010                  | 0.087                     |
| 20 × 20                    | <i>D<sub>pw</sub></i>          | 0.004***                                                   | 0.004                  | 0.000***                  |
|                            | <i>D<sub>nn</sub></i>          | 0.207***                                                   | 0.027***               | 0.197***                  |
| 50 × 50                    | <i>D<sub>pw</sub></i>          | 0.174***                                                   | 0.007                  | 0.173***                  |
|                            | <i>D<sub>nn</sub></i>          | 0.144***                                                   | 0.064***               | 0.114***                  |
| 100 × 100                  | <i>D<sub>pw</sub></i>          | 0.196***                                                   | 0.018                  | 0.235***                  |
|                            | <i>D<sub>nn</sub></i>          | 0.325***                                                   | 0.150***               | 0.300***                  |

\*\*\* P < 0.001, \*\* P < 0.01, \* P < 0.05

**Table S4 The variation of functional dissimilarity explained by geographic and environmental distances across scales using multiple regressions on distance matrices based on non-abundance-weighted metrics.**

| Scale<br>(m <sup>2</sup> ) | Response<br>distance<br>matrix | Explanatory distance matrices                              |                        |                           |
|----------------------------|--------------------------------|------------------------------------------------------------|------------------------|---------------------------|
|                            |                                | Combination of<br>geographic and<br>environmental distance | Geographic<br>distance | Environmental<br>distance |
| 10 × 10                    | $D_{pw}$                       | 0.004                                                      | 0.000                  | 0.004                     |
|                            | $D_{nn}$                       | 0.036*                                                     | 0.008                  | 0.033                     |
| 20 × 20                    | $D_{pw}$                       | 0.016***                                                   | 0.008***               | 0.007***                  |
|                            | $D_{nn}$                       | 0.020***                                                   | 0.019***               | 0.000***                  |
| 50 × 50                    | $D_{pw}$                       | 0.058***                                                   | 0.007***               | 0.058***                  |
|                            | $D_{nn}$                       | 0.142***                                                   | 0.068***               | 0.108***                  |
| 100 × 100                  | $D_{pw}$                       | 0.000***                                                   | 0.000***               | 0.000***                  |
|                            | $D_{nn}$                       | 0.242***                                                   | 0.080***               | 0.236***                  |

\*\*\* P < 0.001, \*\* P < 0.01, \* P < 0.05

**Table S5 One-tailed student's t test for whether the mean phylogenetic and functional dissimilarity within habitats was lower than that across habitats.**

| Habitats | Phylogenetic                | Phylogenetic                | Functional                  | Functional                  |
|----------|-----------------------------|-----------------------------|-----------------------------|-----------------------------|
|          | <i>S.E.S D<sub>pw</sub></i> | <i>S.E.S D<sub>nn</sub></i> | <i>S.E.S D<sub>pw</sub></i> | <i>S.E.S D<sub>nn</sub></i> |
|          | <i>P</i> value              | <i>P</i> value              | <i>P</i> value              | <i>P</i> value              |
| VV-VS    | 0.530                       | <b>0.000</b>                | <b>0.023</b>                | <b>0.001</b>                |
| VV-VR    | <b>0.001</b>                | <b>0.001</b>                | <b>0.001</b>                | <b>0.001</b>                |
| VV-SR    | <b>0.001</b>                | <b>0.000</b>                | <b>0.001</b>                | <b>0.001</b>                |
| SS-VS    | <b>0.005</b>                | <b>0.000</b>                | <b>0.001</b>                | <b>0.001</b>                |
| SS-VR    | <b>0.001</b>                | <b>0.000</b>                | <b>0.001</b>                | <b>0.001</b>                |
| SS-SR    | <b>0.001</b>                | <b>0.000</b>                | <b>0.001</b>                | <b>0.001</b>                |
| RR-VS    | <b>0.001</b>                | <b>0.001</b>                | <b>0.001</b>                | <b>0.001</b>                |
| RR-VR    | <b>0.001</b>                | <b>0.001</b>                | <b>0.001</b>                | <b>0.001</b>                |
| RR-SR    | 0.236                       | 0.068                       | 0.673                       | 0.041                       |

V: Valley; S: Slope; R: Ridge. The same letters represent phylogenetic and functional dissimilarity within habitats (i.e. VV, SS, RR) and the different letters represent that across habitats (i.e. VS, VR, SR).  $P < 0.025$  is shown in bold.



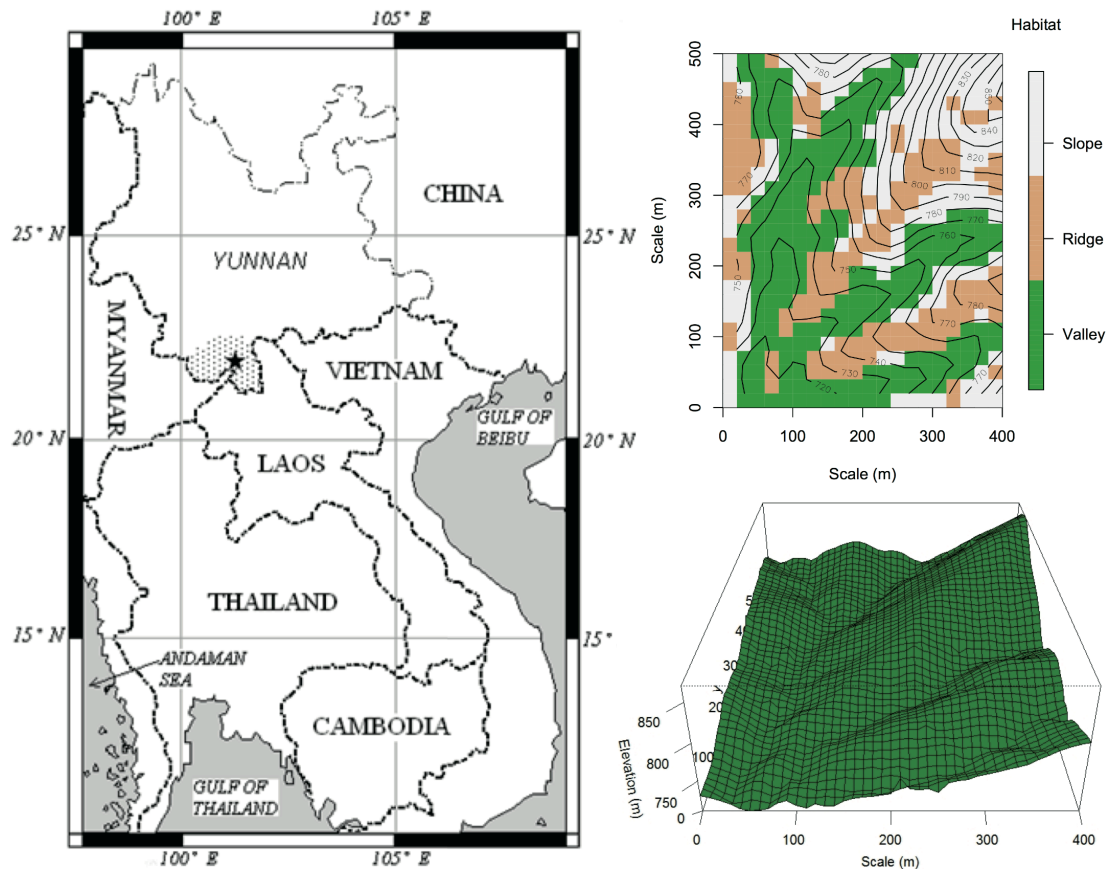

**Figure S1 Geographical location and the spatial distribution of the three habitat types in 20-ha Xishuangbanna forest dynamics plot. Colors represent different habitat types at the spatial scale of  $20 \times 20$  m. The map was generated using DIVA-GIS 7.5.**

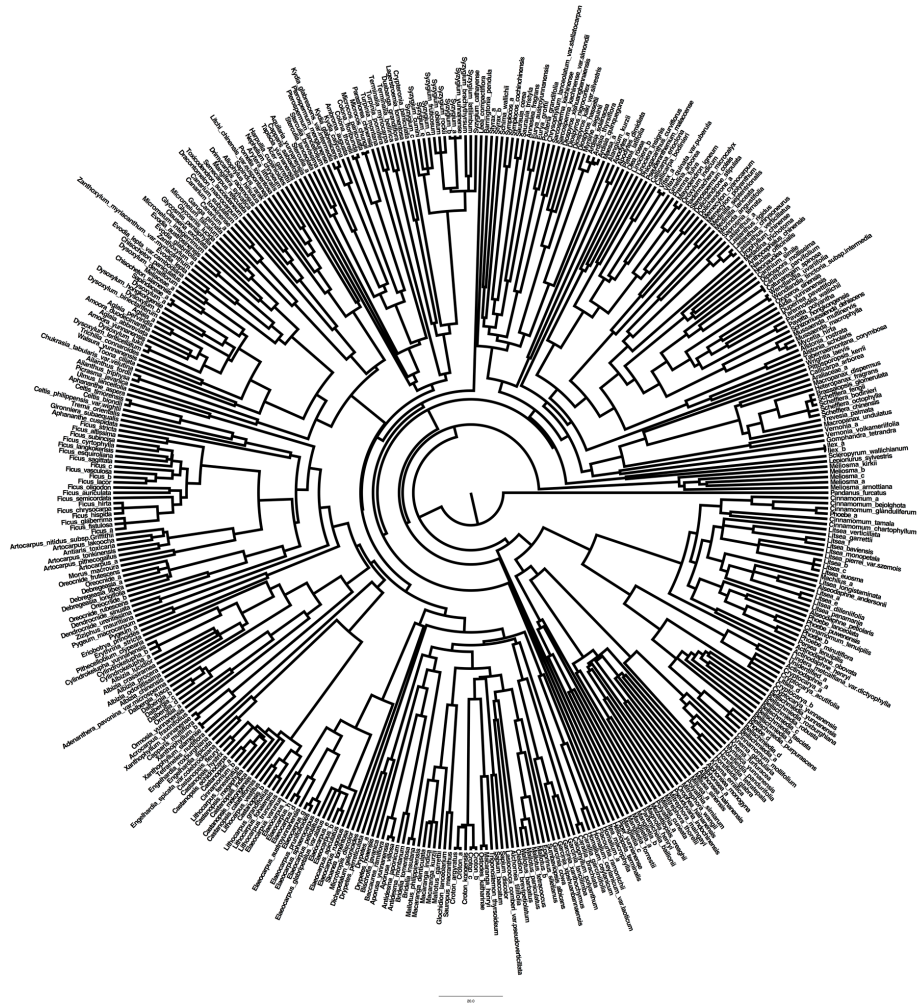

**Figure S2 The phylogenetic tree constructed from DNA barcodes of the 428 species in the 20-ha Xishuangbanna forest dynamics plot.**

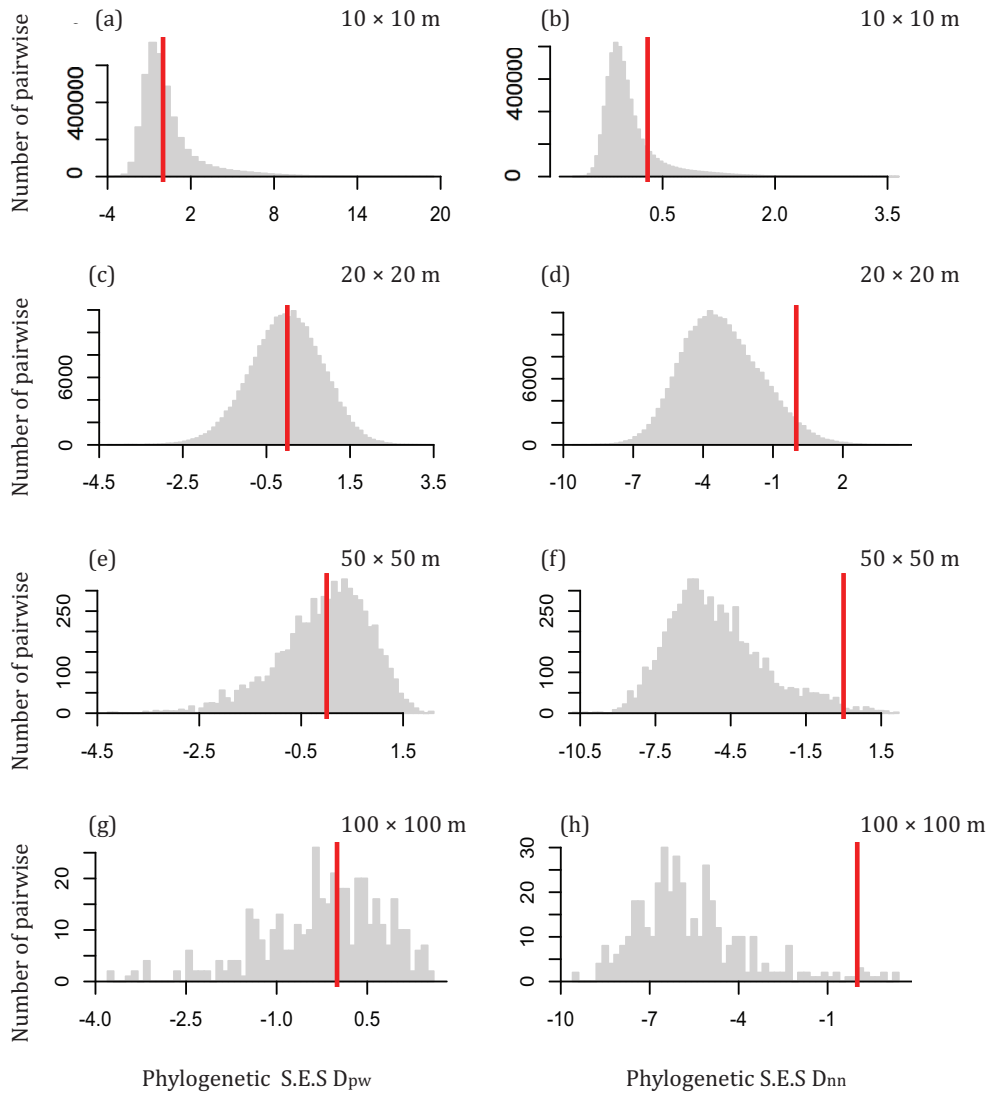

**Figure S3 The distribution of standard effective size for non-abundance-weighted mean pairwise phylogenetic distance ( $S.E.S. D_{pw}$ ) and standard effective size for non-abundance-weighted mean nearest taxon phylogenetic distance ( $S.E.S. D_{nn}$ ) across scales. Bars to the left of the red zero line indicates phylogenetic turnover is faster than expected. The proportions of S.E.S values below zero were as follows: (a) 65.16%, (b) 77.35%, (c) 51.28%, (d) 81.76%, (e) 47.80%, (f) 85.81%, (g) 69.75%, (h) 94.56%.**

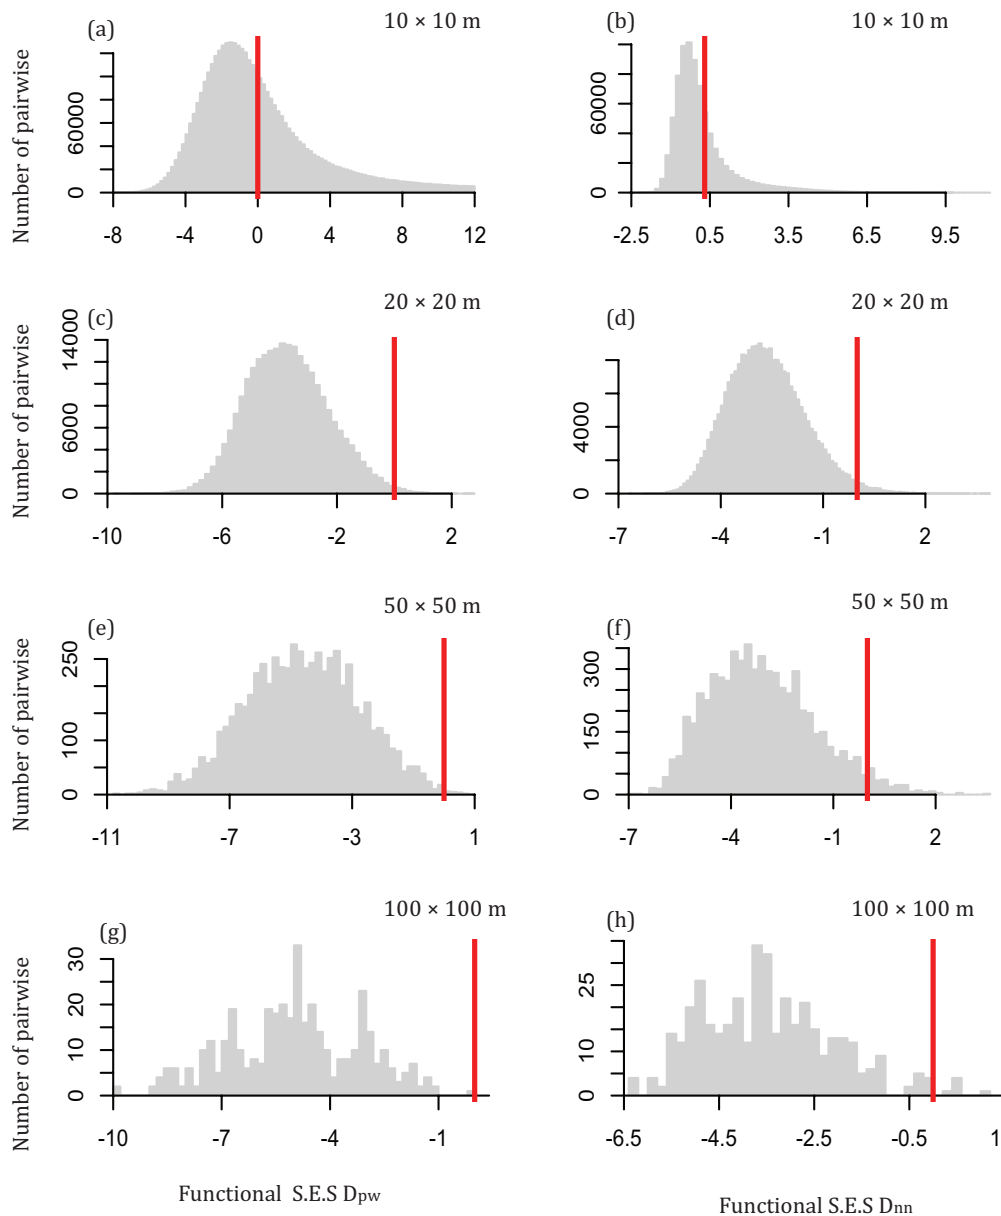

**Figure S4 The distribution of standard effective size for non-abundance-weighted mean pairwise functional distance ( $S.E.S. D_{pw}$ ) and standard effective size for non-abundance-weighted mean nearest taxon functional distance ( $S.E.S. D_{nn}$ ) across scales. Bars to the left of the red zero line indicates functional turnover is faster than expected. The proportions of S.E.S. values below zero were as follows: (a) 56.35%, (b) 71.26%, (c) 95.6%, (d) 95.48%, (e) 98.02%, (f) 95.91%, (g) 99.6%, (h) 90.25%.**
